# Supplementary material
Source: publisher figshare collection journal article supplement (https://diabetesjournals.figshare.com/ndownloader/files/25768637)
Supplement: Supplementary file 1 [file 25768637]

## SUPPLEMENTARY DATA

### Pharmacokinetics and Pharmacodynamics of Three Different Formulations of Insulin Aspart: A Randomized, Double-Blind, Crossover Study in Men with Type 1 Diabetes

Eva Svehlikova,<sup>1</sup> Ines Mursic,<sup>1</sup> Thomas Augustin,<sup>2</sup> Christoph Magnes,<sup>2</sup> David Gerring,<sup>3</sup> Jan Jezek,<sup>3</sup> Daniela Schwarzenbacher,<sup>1</sup> Maria Ratzer,<sup>2</sup> Michael Wolf,<sup>1</sup> Sarah Howell,<sup>3</sup> Leon Zakrzewski,<sup>3</sup> Martina Urschitz,<sup>1</sup> Bernd Tschapeller,<sup>2</sup> Christina Gatschelhofer,<sup>1</sup> Franz Feichtner,<sup>2</sup> Fiona Lawrence,<sup>3</sup> and Thomas R. Pieber,<sup>1,2</sup>

<sup>1</sup> Division of Endocrinology and Diabetology, Department of Internal Medicine, Medical University of Graz, Graz, Austria

<sup>2</sup> Joanneum Research Forschungsgesellschaft mbH, HEALTH – Institute for Biomedicine and Health Sciences, Graz, Austria

<sup>3</sup> Arecor Limited, Little Chesterford, U.K.

**Screened**

27 individuals assessed for eligibility

**Enrolled**

19 participants randomized

8 individuals not randomized  
did not meet all inclusion criteria or  
met one or more exclusion criteria

**Dosing visit 1**

AT247  
n=3

AT247  
n=3

IAsp  
n=3

IAsp  
n=3

faster IAsp  
n=3

faster IAsp  
n=4

**Dosing visit 2**

IAsp  
n=3

faster IAsp  
n=3

faster IAsp  
n=3

AT247  
n=3

IAsp  
n=3

AT247  
n=4

1 participant  
withdrew consent

**Dosing visit 3**

faster IAsp  
n=3

IAsp  
n=3

AT247  
n=3

faster IAsp  
n=3

AT247  
n=3

IAsp  
n=3

**Completed**

18 participants completed the trial

**Analyzed**

19 participants in full analysis set

**Supplementary Figure 1.** Participant disposition and study design (AT247, novel formulation of insulin aspart; IAsp, NovoRapid®; faster IAsp, Fiasp®). Dosing visits were separated by a 3- to 15-day washout period.

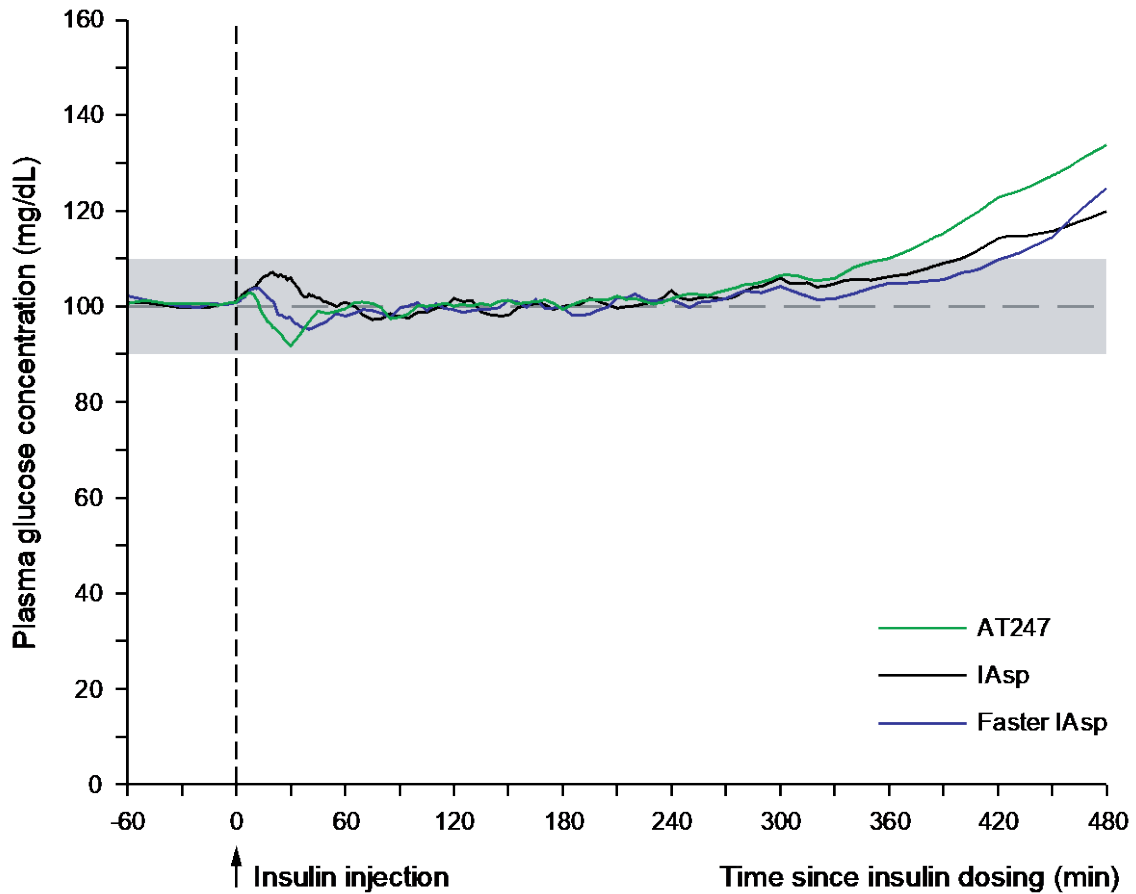

**Supplementary Figure 2.** Mean plasma glucose concentration during the euglycemic clamps after subcutaneous injection of 0.3 units/kg of a novel insulin aspart formulation (AT247), IAsp, or faster IAsp in men with type 1 diabetes. The gray-shaded area shows the plasma glucose clamp target range of 100 mg/dL (5.5 mmol/L)  $\pm$  10%. Number of participants: 19 for AT247 and faster IAsp; 18 for IAsp.

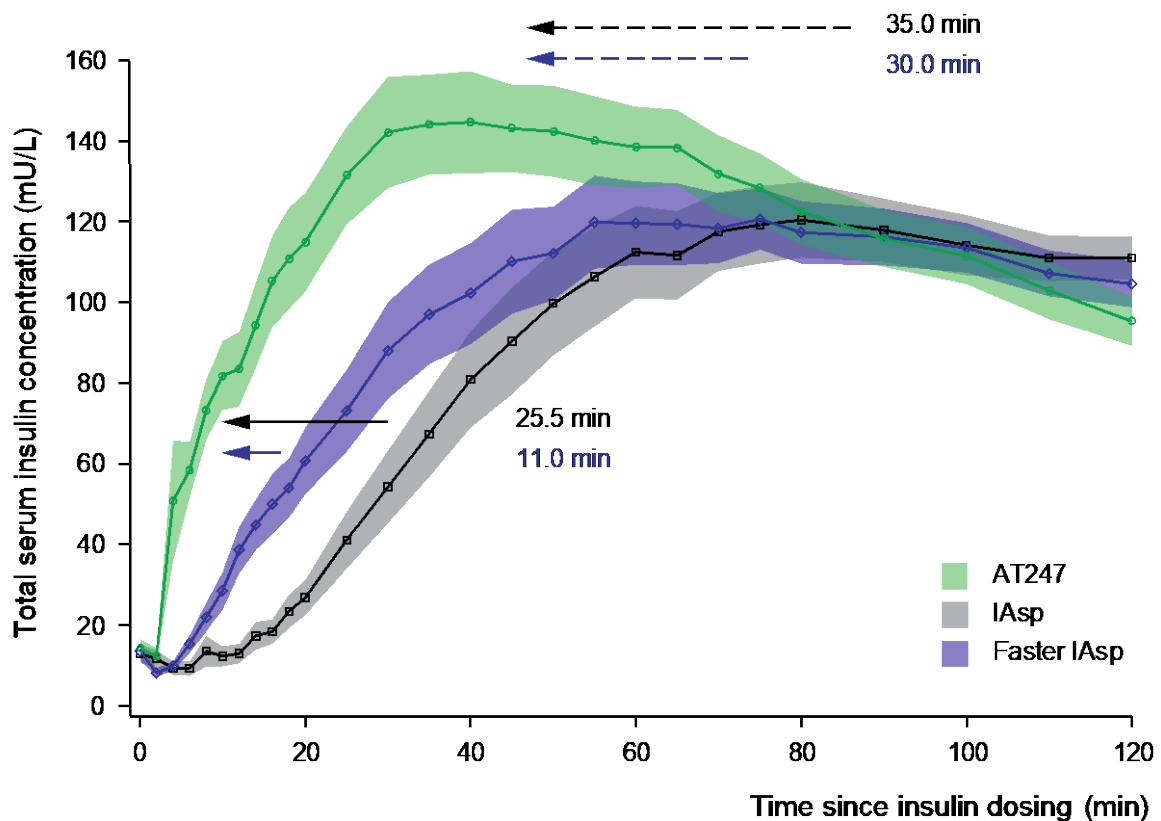

**Supplementary Figure 3.** Mean total insulin (sum of human insulin and insulin aspart) concentration-time profile after subcutaneous administration of 0.3 units/kg of a novel insulin aspart formulation (AT247), IAsp, or faster IAsp for 2 h postdose. Variability bands show the SEM. Arrows represent differences in time to 50% of maximum total insulin concentration ( $t_{\text{Early50}\%C_{\text{max}}}$  treatment difference [95% CI] AT247–IAsp: -25.5 min [-31; -19],  $P=0.0004$ ; AT247–faster IAsp: -11.0 min [-13; -6],  $P=0.0004$ ) and in time to maximum total insulin concentration ( $t_{\text{max}}$  treatment difference [95% CI] AT247–IAsp: -35.0 min [-80; -20],  $P=0.0004$ ; AT247–faster IAsp: -30 min [-50; -10],  $P=0.0028$ ). Number of participants: 19 for AT247 and faster IAsp; 18 for IAsp.

**Supplementary Table 1.** Glucose clamp quality for a novel formulation of insulin aspart (AT247) and currently marketed insulin aspart formulations (IAsp and faster IAsp)

|                            | AT247*<br><i>n</i> = 19 | IAsp*<br><i>n</i> = 18 | Faster IAsp*<br><i>n</i> = 19 |
|----------------------------|-------------------------|------------------------|-------------------------------|
| Precision (%)†             | 4.5 ± 1.2               | 5.9 ± 2.6              | 4.4 ± 1.4                     |
| Control deviation (mg/dL)‡ | 0.40 ± 1.49             | 2.80 ± 4.04            | 0.62 ± 1.65                   |

\* Data are presented as arithmetic mean ± SD.

† Coefficient of variation of the plasma glucose measurements.

‡ Mean difference between the plasma glucose measurements and the target glucose level.

**Supplementary Table 2.** Primary analysis results for area under the curve endpoints

|                                 | Treatment ratio* (95% CI)<br><i>P</i> | Treatment difference† (95% CI)<br><i>P</i> | Treatment ratio* (95% CI)<br><i>P</i> | Treatment difference† (95% CI)<br><i>P</i> |
|---------------------------------|---------------------------------------|--------------------------------------------|---------------------------------------|--------------------------------------------|
|                                 | AT247-to-IAsp                         | AT247-IAsp                                 | AT247-to-faster IAsp                  | AT247-faster IAsp                          |
| Exposure (mU•h/L)               |                                       |                                            |                                       |                                            |
| AUC <sub>Asp,0-16min</sub>      | nc                                    | 11.97 (6.72; 17.06)<br>0.0004              | nc                                    | 8.38 (4.68; 12.27)<br>0.0003               |
| AUC <sub>Asp,0-30min</sub>      | 6.91 (5.09; 9.38)<br><0.0001          | nc                                         | 2.25 (1.67; 3.04)<br><0.0001          | nc                                         |
| AUC <sub>Asp,0-60min</sub>      | 2.52 (2.13; 2.97)<br><0.0001          | nc                                         | 1.56 (1.33; 1.83)<br><0.0001          | nc                                         |
| AUC <sub>Asp,0-90min</sub>      | 1.72 (1.50; 1.97)<br><0.0001          | nc                                         | 1.31 (1.15; 1.50)<br>0.0003           | nc                                         |
| AUC <sub>Asp,0-2h</sub>         | 1.43 (1.26; 1.62)<br><0.0001          | nc                                         | 1.19 (1.05; 1.35)<br>0.0068           | nc                                         |
| AUC <sub>Asp,0-8h</sub>         | 1.03 (0.94; 1.12)<br>0.5612           | nc                                         | 0.96 (0.89; 1.05)<br>0.3929           | nc                                         |
| Glucose-lowering effect (mg/kg) |                                       |                                            |                                       |                                            |
| AUC <sub>GIR,0-16min</sub>      | nc                                    | 0.00 (0.00; 3.67)<br>0.012                 | nc                                    | 0.00 (0.00; 3.67)<br>0.0124                |
| AUC <sub>GIR,0-30min</sub>      | nc                                    | 36.79 (11.64; 45.09)<br>0.0004             | nc                                    | 18.94 (5.43; 38.06)<br>0.0007              |
| AUC <sub>GIR,0-60min</sub>      | nc                                    | 143.86 (82.98; 189.76)<br>0.0004           | nc                                    | 81.43 (59.76; 139.01)<br>0.0009            |
| AUC <sub>GIR,0-90min</sub>      | nc                                    | 197.47 (129.58; 259.86)<br>0.0004          | nc                                    | 94.22 (30.53; 205.50)<br>0.0128            |
| AUC <sub>GIR,0-2h</sub>         | 1.81 (1.49; 2.20)<br><0.0001          | nc                                         | 1.27 (1.05; 1.53)<br>0.015            | nc                                         |
| AUC <sub>GIR,0-8h</sub>         | nc                                    | 44.38 (-171.81; 323.37)<br>0.4268          | nc                                    | -75.23 (-164.96; 196.00)<br>0.7133         |

Number of participants: 19 for AT247 and faster IAsp; 18 for IAsp. nc: not calculable/calculated.

\* Mean treatment ratios based on log-transformed data analyzed by means of a mixed effects model and results back-transformed to the original scale, *P* calculated using the student t-test.

† Median treatment difference based on untransformed data, *P* calculated using the Wilcoxon rank sum test.

**Supplementary Table 3.** Exposure and glucose-lowering effect for a novel formulation of insulin aspart (AT247) versus currently marketed insulin aspart formulations (IAsp and faster IAsp)

|                                 | AT247*<br><i>n</i> = 19 | IAsp*<br><i>n</i> = 18 | Faster IAsp*<br><i>n</i> = 19 | Treatment ratio† (95% CI)<br>AT247-to-IAsp | Treatment ratio† (95% CI)<br>AT247-to-faster IAsp |
|---------------------------------|-------------------------|------------------------|-------------------------------|--------------------------------------------|---------------------------------------------------|
| Exposure (mU•h/L)               |                         |                        |                               |                                            |                                                   |
| AUC <sub>Asp,0-16min</sub>      | 14.3 ± 8.0              | 1.2 ± 1.2              | 5.2 ± 3.9                     | 12.0 (9.3; 19.0)                           | 2.7 (2.1; 3.8)                                    |
| AUC <sub>Asp,0-30min</sub>      | 41.6 ± 20.4             | 8.1 ± 6.8              | 20.4 ± 13.3                   | 5.3 (4.3; 7.5)                             | 2.0 (1.7; 2.6)                                    |
| AUC <sub>Asp,0-60min</sub>      | 111.1 ± 45.0            | 50.4 ± 31.9            | 73.8 ± 38.6                   | 2.3 (1.9; 2.9)                             | 1.5 (1.3; 1.8)                                    |
| AUC <sub>Asp,0-90min</sub>      | 174.3 ± 61.7            | 108.1 ± 51.3           | 133.8 ± 54.7                  | 1.7 (1.4; 2.0)                             | 1.3 (1.1; 1.5)                                    |
| AUC <sub>Asp,0-2h</sub>         | 226.8 ± 72.1            | 163.9 ± 61.7           | 189.4 ± 64.0                  | 1.4 (1.2; 1.7)                             | 1.2 (1.1; 1.4)                                    |
| AUC <sub>Asp,0-8h</sub>         | 415.4 ± 87.7            | 403.9 ± 71.0           | 426.6 ± 74.8                  | 1.1 (1.0; 1.1)                             | 1.0 (0.9; 1.1)                                    |
| Glucose-lowering effect (mg/kg) |                         |                        |                               |                                            |                                                   |
| AUC <sub>GIR,0-16min</sub>      | 1.6 ± 2.5               | 0.0 ± 0.0              | 0.0 ± 0.0                     | nc                                         | nc                                                |
| AUC <sub>GIR,0-30min</sub>      | 33.9 ± 24.8             | 2.9 ± 7.6              | 11.7 ± 13.0                   | 11.9 (nc)                                  | 2.9 (2.1; 5.0)                                    |
| AUC <sub>GIR,0-60min</sub>      | 220.0 ± 113.1           | 81.2 ± 97.7            | 132.1 ± 94.3                  | 2.8 (2.0; 5.5)                             | 1.7 (1.3; 2.3)                                    |
| AUC <sub>GIR,0-90min</sub>      | 423.8 ± 193.0           | 240.7 ± 221.3          | 317.2 ± 164.0                 | 1.8 (1.4; 2.7)                             | 1.3 (1.1; 1.6)                                    |
| AUC <sub>GIR,0-2h</sub>         | 655.9 ± 289.1           | 440.0 ± 318.0          | 517.6 ± 236.7                 | 1.5 (1.3; 2.0)                             | 1.3 (1.1; 1.5)                                    |
| AUC <sub>GIR,0-8h</sub>         | 1741.7 ± 610.7          | 1719.1 ± 662.4         | 1751.6 ± 544.9                | 1.0 (0.9; 1.1)                             | 1.0 (0.9; 1.1)                                    |

nc: not calculable

\* Data are presented as arithmetic mean ± SD.

† Mean treatment ratio (calculated using the Fieller method).

**Supplementary Table 4.** Per-protocol and post hoc analysis results for onset of action

| Onset of action         | AT247*<br><i>n</i> = 19  | IAsp*<br><i>n</i> = 18   | Faster IAsp*<br><i>n</i> = 19 | Treatment ratio† (95% CI)<br><i>P</i> | Treatment ratio† (95% CI)<br><i>P</i> |
|-------------------------|--------------------------|--------------------------|-------------------------------|---------------------------------------|---------------------------------------|
|                         |                          |                          |                               | AT247-to-IAsp                         | AT247-to-faster IAsp                  |
| Per-protocol definition | 17.0 min<br>(13.0; 24.0) | 37.0 min<br>(35.0; 63.0) | 23.0 min<br>(22.0; 35.0)      | -23.0 min (-37; -15)<br>0.0004        | -9.0 min (-11; -3)<br>0.0006          |
| Post hoc definition     | 14.0 min<br>(13.0; 16.0) | 28.5 min<br>(23.0; 36.0) | 19.0 min<br>(17.0; 24.0)      | -14.0 min (-22; -10)<br>0.0006        | -5.0 min (-9; -3)<br>0.0003           |

Per-protocol definition: time after insulin injection until plasma glucose concentration has decreased at least 5 mg/dL (0.3 mmol/L) from the baseline.

Post hoc definition: time after insulin injection until plasma glucose concentration has decreased at least 5 mg/dL (0.3 mmol/L) from highest plasma glucose level measured postdose.

\* Data are presented as median (25th percentile; 75th percentile).

† Median treatment difference (treatment comparison calculated using the Wilcoxon rank sum test using untransformed parameters).



## SUPPLEMENTARY DATA

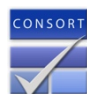

### CONSORT checklist of information to include when reporting a randomized crossover trial\*

| Section/Topic             | Item No | Checklist item                                                                                                                                                                                                     | Reported on page No |
|---------------------------|---------|--------------------------------------------------------------------------------------------------------------------------------------------------------------------------------------------------------------------|---------------------|
| <b>Title and abstract</b> |         |                                                                                                                                                                                                                    |                     |
|                           | 1a      | Identification as a randomized crossover trial in the title                                                                                                                                                        | 1                   |
|                           | 1b      | Specify a crossover design and report all information according to the CONSORT for abstracts checklist (structured summary of trial design, methods, results, and conclusions)                                     | 1                   |
| <b>Introduction</b>       |         |                                                                                                                                                                                                                    |                     |
| Background and objectives | 2a      | Scientific background and explanation of rationale                                                                                                                                                                 | 2                   |
|                           | 2b      | Specific objectives or hypotheses                                                                                                                                                                                  | 2                   |
| <b>Methods</b>            |         |                                                                                                                                                                                                                    |                     |
| Trial design              | 3a      | Rationale for a crossover design. Description of the design features including allocation ratio, especially the number and duration of periods, duration of washout period, and consideration of carry over effect | 2                   |
|                           | 3b      | Important changes to methods after trial commencement (such as eligibility criteria), with reasons                                                                                                                 | n.a.                |
| Participants              | 4a      | Eligibility criteria for participants                                                                                                                                                                              | 2                   |
|                           | 4b      | Settings and locations where the data were collected                                                                                                                                                               | 2                   |
| Interventions             | 5       | The interventions with sufficient details to allow replication, including how and when they were actually administered                                                                                             | 2 - 3               |
| Outcomes                  | 6a      | Completely defined pre-specified primary and secondary outcome measures, including how and when they were assessed                                                                                                 | 3                   |
|                           | 6b      | Any changes to trial outcomes after the trial commenced, with reasons                                                                                                                                              | n.a.                |
| Sample size               | 7a      | How sample size was determined, accounting for within participant variability                                                                                                                                      | 3                   |

|                                                      |     |                                                                                                                                                                                             |                              |
|------------------------------------------------------|-----|---------------------------------------------------------------------------------------------------------------------------------------------------------------------------------------------|------------------------------|
|                                                      | 7b  | When applicable, explanation of any interim analyses and stopping guidelines                                                                                                                | n.a.                         |
| Randomization:                                       |     |                                                                                                                                                                                             |                              |
| Sequence generation                                  | 8a  | Method used to generate the random allocation sequence                                                                                                                                      | 2                            |
|                                                      | 8b  | Type of randomization; details of any restriction (such as blocking and block size)                                                                                                         | 2                            |
| Allocation concealment mechanism                     | 9   | Mechanism used to implement the random allocation sequence (such as sequentially numbered containers), describing any steps taken to conceal the sequence until interventions were assigned | 2                            |
| Implementation                                       | 10  | Who generated the random allocation sequence, who enrolled participants, and who assigned participants to the sequence of interventions                                                     | 2                            |
| Blinding                                             | 11a | If done, who was blinded after assignment to interventions (for example, participants, care providers, those assessing outcomes) and how                                                    | 2                            |
|                                                      | 11b | If relevant, description of the similarity of interventions                                                                                                                                 | 2                            |
| Statistical methods                                  | 12a | Statistical methods used to compare groups for primary and secondary outcomes which are appropriate for crossover design                                                                    | 3                            |
|                                                      | 12b | Methods for additional analyses, such as subgroup analyses and adjusted analyses                                                                                                            | 3                            |
| <b>Results</b>                                       |     |                                                                                                                                                                                             |                              |
| Participant flow (a diagram is strongly recommended) | 13a | The numbers of participants who were randomly assigned, received intended treatment, and were analyzed for the primary outcome, separately for each sequence and period                     | Supplementary Figure 1       |
|                                                      | 13b | No of participants excluded at each stage, with reasons, separately for each sequence and period                                                                                            | Supplement Figure 1          |
| Recruitment                                          | 14a | Dates defining the periods of recruitment and follow-up                                                                                                                                     | 3                            |
|                                                      | 14b | Why the trial ended or was stopped                                                                                                                                                          | n.a.                         |
| Baseline data                                        | 15  | A table showing baseline demographic and clinical characteristics by sequence and period                                                                                                    | 3 - 4                        |
| Numbers analyzed                                     | 16  | Number of participants (denominator) included in each analysis and whether the analysis was by original assigned groups                                                                     | 3;<br>Supplementary Figure 1 |

|                          |     |                                                                                                                                                          |                                           |
|--------------------------|-----|----------------------------------------------------------------------------------------------------------------------------------------------------------|-------------------------------------------|
| Outcomes and estimation  | 17a | For each primary and secondary outcome, results including estimated effect size and its precision (such as 95% confidence interval)                      | 4 - 6; Table 1; Supplementary Table 2 - 4 |
|                          | 17b | For binary outcomes, presentation of both absolute and relative effect sizes is recommended                                                              | n.a.                                      |
| Ancillary analyses       | 18  | Results of any other analyses performed, including subgroup analyses and adjusted analyses, distinguishing pre-specified from exploratory                | Supplementary Table 3 and 4               |
| Harms                    | 19  | Describe all important harms or unintended effects in a way that accounts for the design                                                                 | 6                                         |
| <b>Discussion</b>        |     |                                                                                                                                                          |                                           |
| Limitations              | 20  | Trial limitations, addressing sources of potential bias, imprecision, and, if relevant, multiplicity of analyses. Consider potential carry over effects. | 6 - 7                                     |
| Generalizability         | 21  | Generalizability (external validity, applicability) of the trial findings                                                                                | 7                                         |
| Interpretation           | 22  | Interpretation consistent with results, balancing benefits and harms, and considering other relevant evidence                                            | 6 - 7                                     |
| <b>Other information</b> |     |                                                                                                                                                          |                                           |
| Registration             | 23  | Registration number and name of trial registry                                                                                                           | 1 and 2                                   |
| Protocol                 | 24  | Where the full trial protocol can be accessed, if available                                                                                              | n.a.                                      |
| Funding                  | 25  | Sources of funding and other support (such as supply of drugs), role of funders                                                                          | 7                                         |

\* Dwan K, Li T, Altman DG, Elbourne D. CONSORT 2010 statement: extension to randomised crossover trials. BMJ 2019; 366:l4378
